# Supplementary material for: Genome-Wide Identification and Evolution of the GRF Gene Family and Functional Characterization of PbGRF18 in Pear
Source: MDPI journal article supplement (doi:10.3390/ijms241914690), 2023-09-28
Supplement: s1 [file s1]

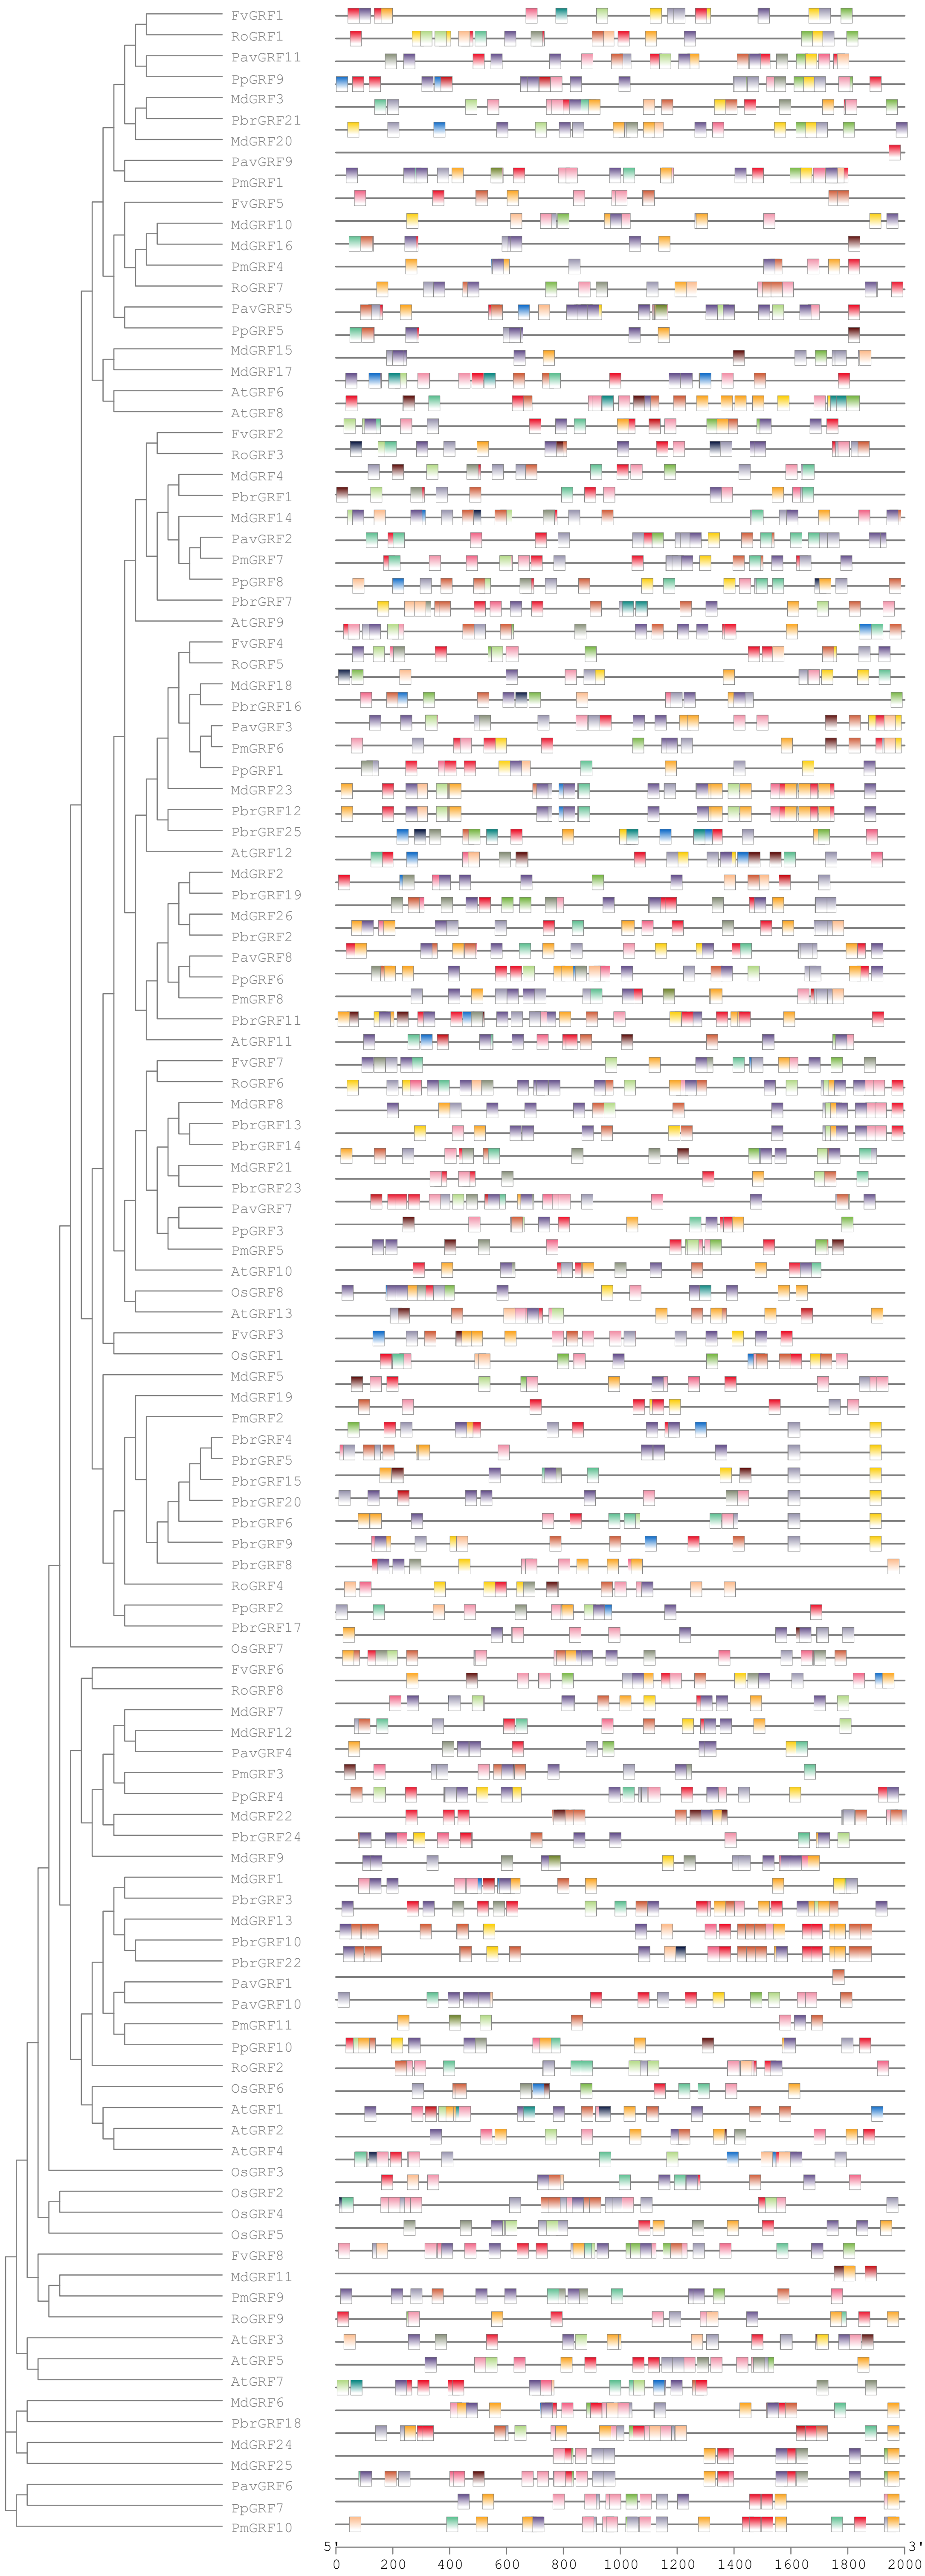

- auxin-responsive element
- cis-acting element involved in low-temperature responsiveness
- cis-acting element involved in salicylic acid responsiveness
- cis-acting element involved in the abscisic acid responsiveness
- cis-acting regulatory element essential for the anaerobic induction
- cis-acting regulatory element involved in light responsiveness
- cis-acting regulatory element involved in zein metabolism regulation
- part of a conserved DNA module involved in light responsiveness
- part of a light responsive element
- cis-acting regulatory element related to meristem expression
- gibberellin-responsive element
- light responsive element
- MYB binding site involved in drought-inducibility
- cis-acting regulatory element involved in the MeJA-responsiveness
- cis-acting element involved in defense and stress responsiveness
- cis-acting element involved in gibberellin-responsiveness
- MYB binding site involved in light responsiveness
- part of an auxin-responsive element
- cis-acting element involved in light responsiveness
