# Supplementary material for: Genome-Wide Identification and Evolution of the GRF Gene Family and Functional Characterization of PbGRF18 in Pear
Source: MDPI journal article supplement (doi:10.3390/ijms241914690), 2023-09-28

**A**

TMHMM posterior probabilities for PbGRF8

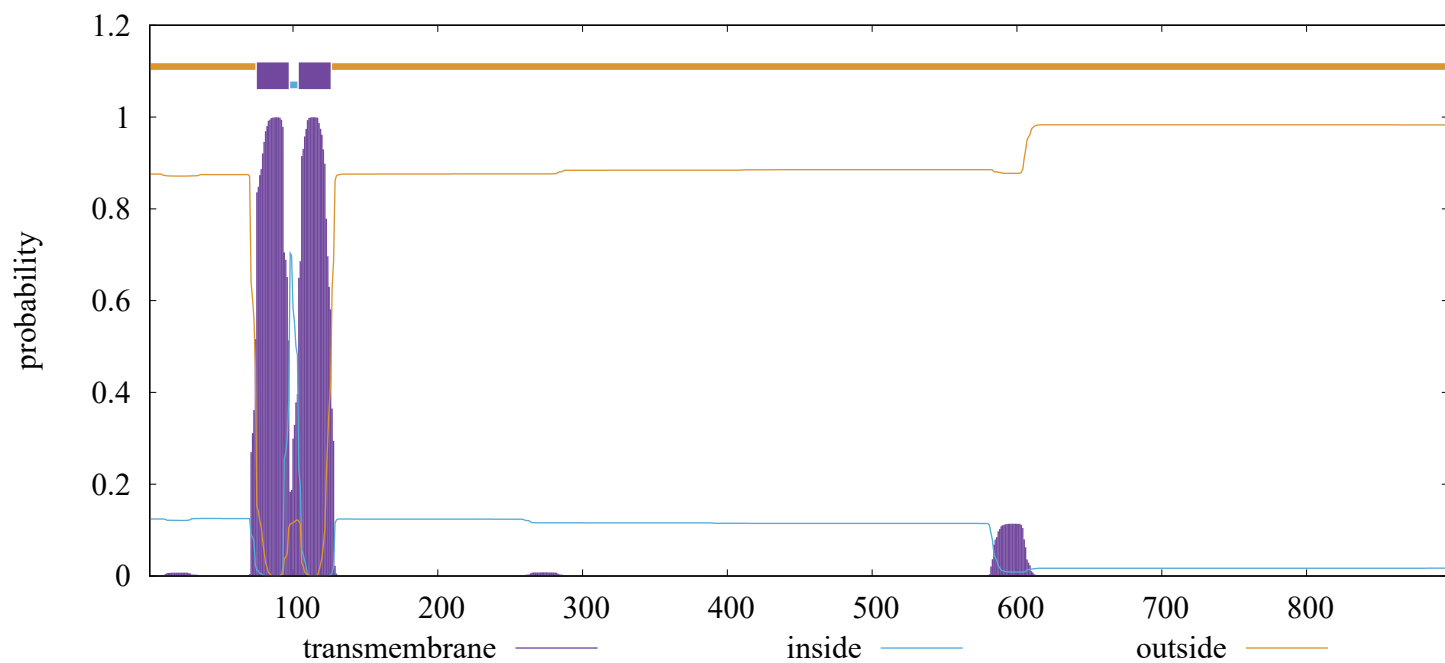**B**

TMHMM posterior probabilities for PbGRF11

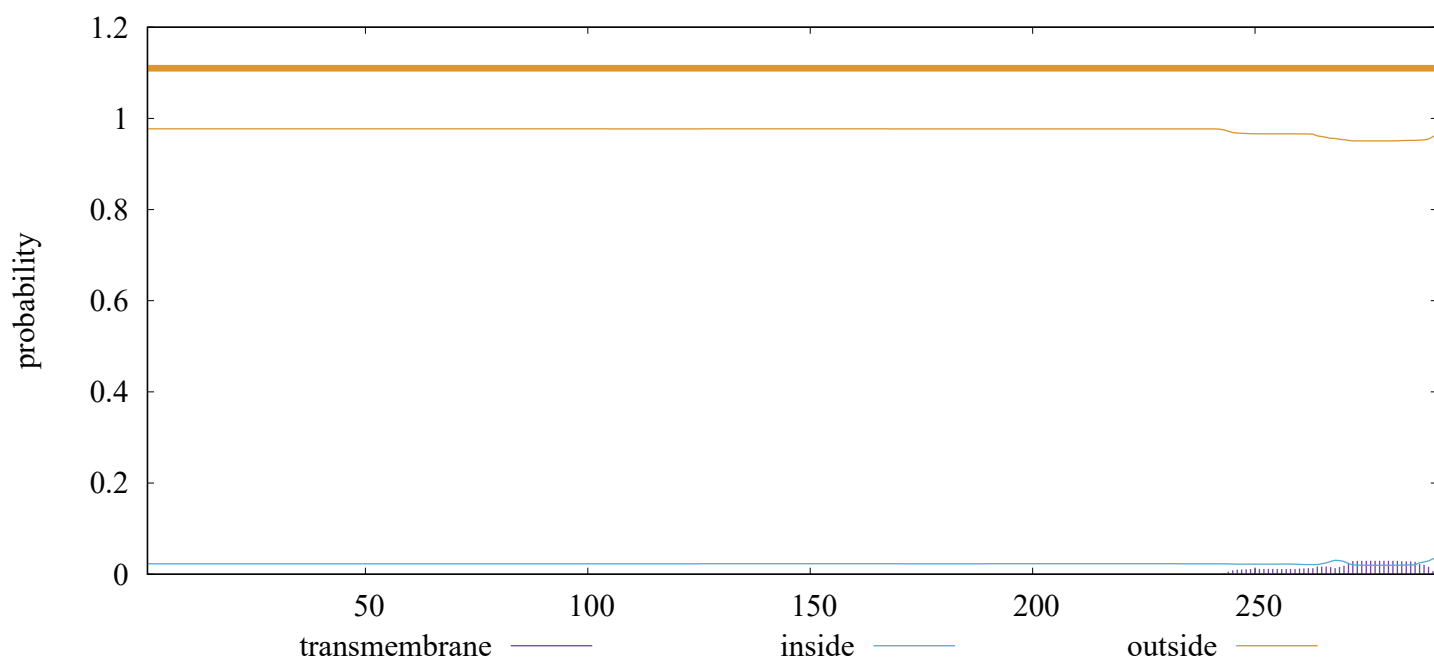**C**

TMHMM posterior probabilities for PbGRF18

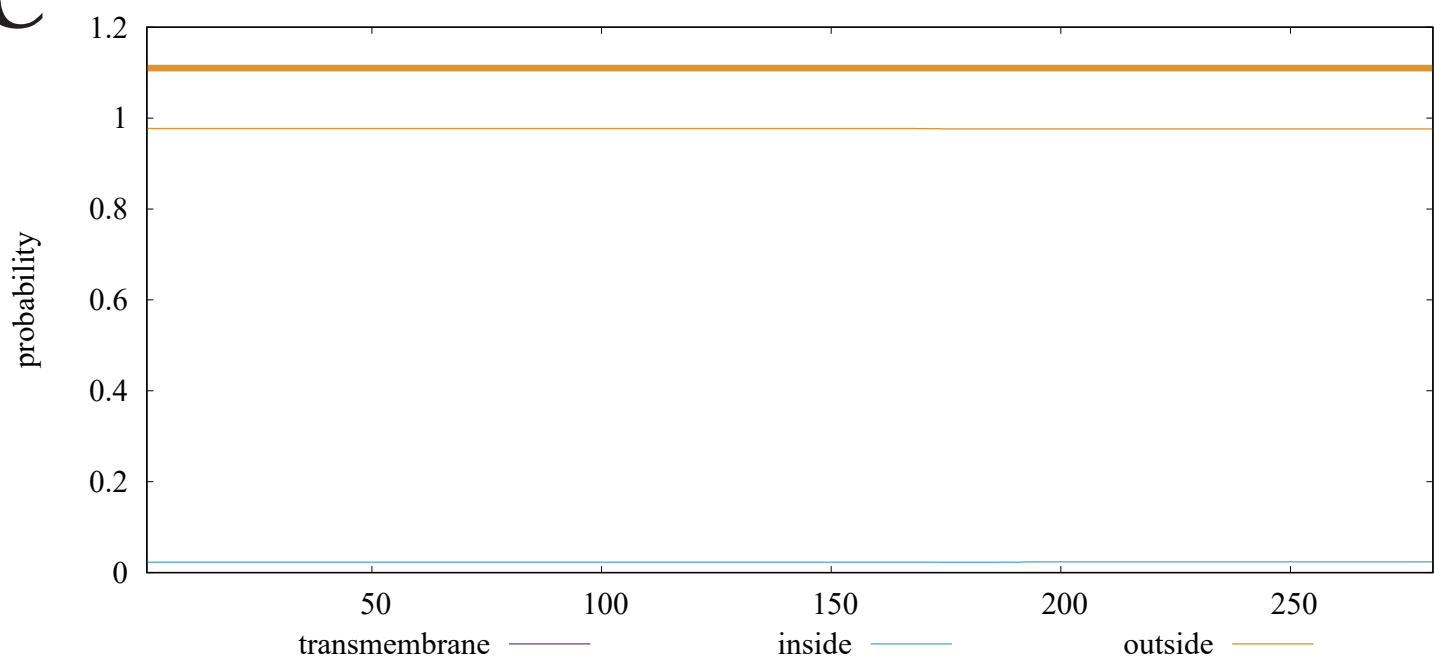

Supplement: s1 [file s1]
