# Supplementary figures and images for: Genome-Wide Identification and Evolution of the GRF Gene Family and Functional Characterization of PbGRF18 in Pear
Source: MDPI journal article supplement (doi:10.3390/ijms241914690), 2023-09-28

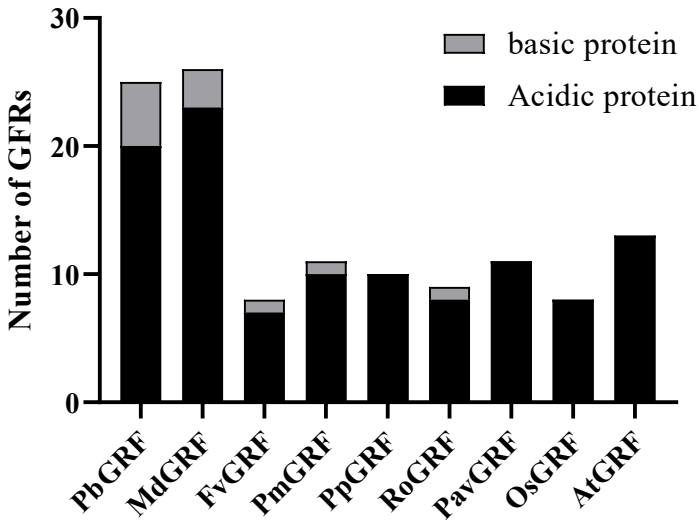

Supplement: s1 [file s1]

Motif 1

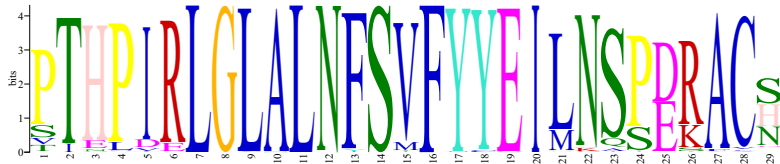

Motif 2

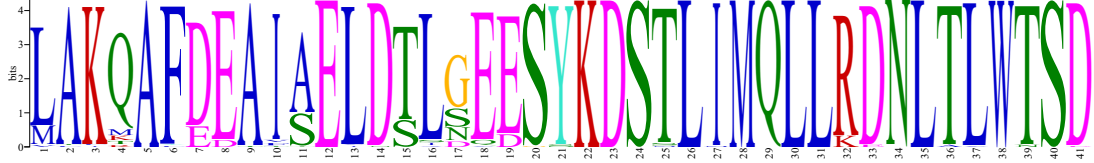

Motif 3

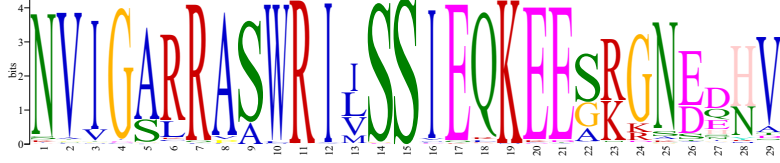

Motif 4

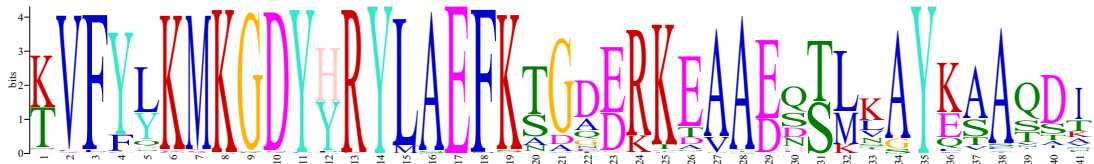

Motif 5

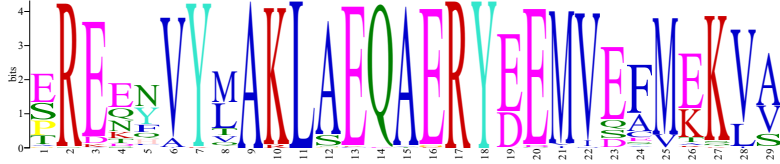

Motif 6

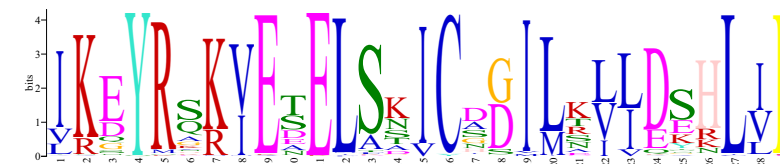

Motif 7

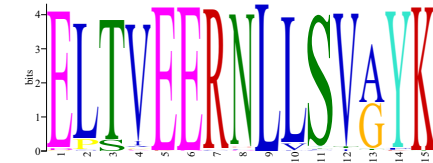

Motif 8

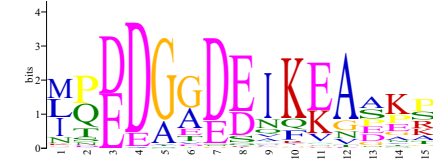

Motif 9

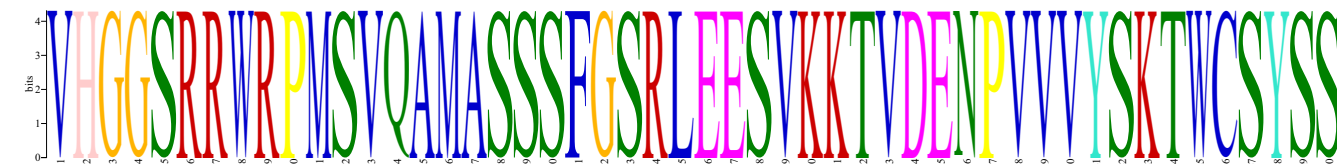

Motif 10

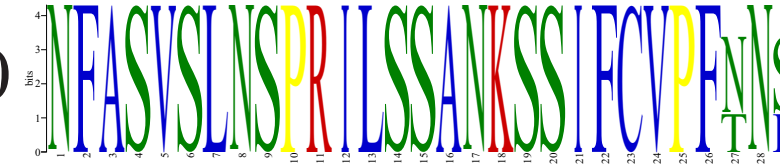

Supplement: s1 [file s1]
